# Supplementary material for: Exploring the Effects of Metabolism-Disrupting Chemicals on Pancreatic α-Cell Viability, Gene Expression and Function: A Screening Testing Approach
Source: MDPI journal article supplement (doi:10.3390/ijms24021044), 2023-01-05
Supplement: s1 [file s1]

## SUPPLEMENTARY MATERIAL

### Exploring the effects of Metabolism-Disrupting Chemicals on Pancreatic $\alpha$ -Cell Viability, Gene Expression and Function: A Screening Testing Approach

Ruba Al-Abdulla<sup>1#</sup>, Hilda Ferrero<sup>1,2#</sup>, Talía Boronat-Belda<sup>1</sup>, Sergi Soriano<sup>1,3</sup>

Iván Quesada<sup>1,2</sup> and Paloma Alonso-Magdalena<sup>1,2\*</sup>

<sup>1</sup> Instituto de Investigación, Desarrollo e Innovación en Biotecnología Sanitaria de Elche (IDiBE), Universidad Miguel Hernández, Elche, Spain.

<sup>2</sup> Centro de Investigación Biomédica en Red de Diabetes y Enfermedades Metabólicas Asociadas (CIBERDEM), Spain.

<sup>3</sup> Departamento de Fisiología, Genética y Microbiología, Universidad de Alicante, Alicante, Spain.

\*Author to whom correspondence should be addressed: Paloma Alonso-Magdalena.

[palonso@umh.es](mailto:palonso@umh.es)

# These authors contributed equally to this work

| 48 h                     | RZ                | NRU               | CFDA-AM           |
|--------------------------|-------------------|-------------------|-------------------|
| Control                  | 100.00 ± 1.72     | 100.00 ± 0.94     | 100.00 ± 1.01     |
| BPA 100 pM               | 94.13 ± 2.04      | 98.74 ± 1.23      | 96.92 ± 0.84      |
| BPA 1 nM                 | 92.42 ± 2.00 *    | 96.31 ± 0.96      | 96.44 ± 1.02      |
| BPA 10 nM                | 93.27 ± 2.18      | 97.58 ± 0.87      | 96.97 ± 1.35      |
| BPA 100 nM               | 90.86 ± 2.00 **   | 97.12 ± 1.03      | 94.27 ± 0.87 **   |
| BPA 1 μM                 | 91.56 ± 1.76 *    | 95.43 ± 1.19 *    | 94.54 ± 1.24 **   |
| BPA 10 μM                | 96.26 ± 1.90      | 93.80 ± 1.49 ***  | 93.70 ± 1.18 ***  |
|                          | RZ                | NRU               | CFDA-AM           |
| Control                  | 100.00 ± 1.15     | 100.00 ± 1.49     | 100.00 ± 0.69     |
| BPS 100 pM               | 100.85 ± 1.61     | 103.46 ± 1.36     | 98.92 ± 0.61      |
| BPS 1 nM                 | 97.83 ± 1.14      | 103.67 ± 0.96     | 99.32 ± 0.76      |
| BPS 10 nM                | 100.93 ± 1.36     | 102.61 ± 1.32     | 100.57 ± 0.49     |
| BPS 100 nM               | 100.22 ± 1.91     | 103.85 ± 1.67     | 99.27 ± 0.94      |
| BPS 1 μM                 | 97.91 ± 2.07      | 103.17 ± 1.12     | 98.23 ± 1.02      |
| BPS 10 μM                | 89.91 ± 3.72      | 90.34 ± 4.04      | 97.53 ± 2.04      |
|                          | RZ                | NRU               | CFDA-AM           |
| Control                  | 100.00 ± 0.61     | 100.00 ± 0.94     | 100.00 ± 0.84     |
| BPF 100 pM               | 96.66 ± 1.03      | 98.54 ± 1.11      | 97.70 ± 0.95      |
| BPF 1 nM                 | 93.63 ± 1.18 ***  | 97.57 ± 1.30      | 94.51 ± 0.97 **   |
| BPF 10 nM                | 91.94 ± 1.09 **** | 96.39 ± 1.02      | 93.84 ± 1.00 **** |
| BPF 100 nM               | 92.35 ± 1.02 **** | 98.62 ± 1.01      | 92.49 ± 0.82 **** |
| BPF 1 μM                 | 90.57 ± 1.15 **** | 97.90 ± 1.18      | 91.45 ± 1.06 **** |
| BPF 10 μM                | 86.61 ± 1.27 **** | 95.01 ± 1.03 *    | 91.27 ± 1.15 **** |
|                          | RZ                | NRU               | CFDA-AM           |
| Control                  | 100.00 ± 0.87     | 100.00 ± 0.75     | 100.00 ± 0.91     |
| DEHP 100 pM              | 96.88 ± 0.84      | 99.16 ± 0.46      | 98.62 ± 0.79      |
| DEHP 1 nM                | 93.80 ± 1.27 **   | 99.69 ± 0.88      | 96.72 ± 0.97      |
| DEHP 10 nM               | 94.70 ± 1.30 *    | 99.53 ± 1.40      | 96.16 ± 0.97 *    |
| DEHP 100 nM              | 93.77 ± 1.30 **   | 99.08 ± 0.68      | 96.01 ± 1.02 *    |
| DEHP 1 μM                | 93.25 ± 1.42 **   | 100.09 ± 1.19     | 94.73 ± 0.94 ***  |
| DEHP 10 μM               | 106.54 ± 1.83 **  | 97.31 ± 0.76      | 95.02 ± 0.94 **   |
|                          | RZ                | NRU               | CFDA-AM           |
| Control                  | 100.00 ± 0.85     | 100.00 ± 1.33     | 100.00 ± 4.02     |
| PFOS 100 pM              | 96.39 ± 1.33      | 98.99 ± 1.14      | 97.94 ± 1.15      |
| PFOS 1 nM                | 91.99 ± 1.84 **   | 97.62 ± 1.01      | 96.36 ± 1.73      |
| PFOS 10 nM               | 85.62 ± 2.37 **** | 88.47 ± 3.45 **** | 93.34 ± 1.92 *    |
| PFOS 100 nM              | 91.97 ± 1.56 **   | 97.37 ± 0.63      | 93.56 ± 2.08 **   |
| PFOS 1 μM                | 89.13 ± 1.34 **** | 97.42 ± 1.49      | 93.26 ± 0.61 **   |
| PFOS 10 μM               | 93.94 ± 1.63 *    | 97.20 ± 1.84      | 91.74 ± 1.07 ***  |
|                          | RZ                | NRU               | CFDA-AM           |
| Control                  | 100.00 ± 1.29     | 100.00 ± 0.92     | 100.00 ± 0.88     |
| CdCl <sub>2</sub> 100 pM | 98.90 ± 1.35      | 99.56 ± 1.25      | 98.67 ± 0.99      |
| CdCl <sub>2</sub> 1 nM   | 98.30 ± 1.56      | 98.12 ± 1.43      | 98.12 ± 1.19      |
| CdCl <sub>2</sub> 10 nM  | 97.55 ± 1.58      | 97.85 ± 1.22      | 97.17 ± 1.20      |
| CdCl <sub>2</sub> 100 nM | 97.82 ± 1.67      | 95.41 ± 1.29 *    | 98.02 ± 1.19      |
| CdCl <sub>2</sub> 1 μM   | 96.31 ± 1.69      | 92.60 ± 1.73 ***  | 96.39 ± 1.37      |
| CdCl <sub>2</sub> 10 μM  | 95.16 ± 1.76      | 94.86 ± 1.09 *    | 95.93 ± 1.39      |
|                          | RZ                | NRU               | CFDA-AM           |
| Control                  | 100.00 ± 0.69     | 100.00 ± 0.52     | 100.00 ± 0.50     |
| DDE 100 pM               | 96.04 ± 1.16 *    | 98.81 ± 1.00      | 97.99 ± 0.94      |
| DDE 1 nM                 | 94.26 ± 1.16 ***  | 98.33 ± 0.68      | 96.06 ± 0.44      |
| DDE 10 nM                | 94.00 ± 1.32 ***  | 99.19 ± 0.81      | 94.19 ± 1.14 ***  |
| DDE 100 nM               | 94.96 ± 1.04 **   | 101.68 ± 0.70     | 95.44 ± 1.22 *    |
| DDE 1 μM                 | 95.03 ± 1.24 **   | 101.69 ± 0.86     | 94.13 ± 1.20 ***  |
| DDE 10 μM                | 95.87 ± 1.04 *    | 103.55 ± 0.74 **  | 90.60 ± 1.19 **** |

**Supplemental Table S1.** Viability of pancreatic αTC1-9 cells treated for 48 h with different BPA, BPS, BPF, DEHP, PFOS, CdCl<sub>2</sub>, or DDE concentrations (100 pM–10 μM) as evaluated by RZ, NR and CFDA-AM assays. n= at least 3 independent experiments. All data are expressed as mean ± SEM. \*vs. Control; \*p < 0.05, \*\*p < 0.01, \*\*\*p < 0.001 and \*\*\*\*p < 0.0001 by one-way ANOVA followed by Dunnet's post hoc test or Kruskal-Wallis followed by Dunn's post hoc test.

| 72 h                     | RZ                | NRU              | CFDA-AM           |
|--------------------------|-------------------|------------------|-------------------|
| Control                  | 100.00 ± 1.28     | 100.00 ± 0.64    | 100.00 ± 0.75     |
| BPA 100 pM               | 98.51 ± 1.53      | 100.09 ± 1.28    | 100.00 ± 0.99     |
| BPA 1 nM                 | 94.97 ± 1.43      | 100.27 ± 1.38    | 98.49 ± 1.11      |
| BPA 10 nM                | 96.22 ± 1.79      | 98.61 ± 1.34     | 97.86 ± 0.92      |
| BPA 100 nM               | 97.53 ± 1.61      | 100.68 ± 1.30    | 98.22 ± 0.75      |
| BPA 1 μM                 | 95.76 ± 0.94      | 101.80 ± 1.26    | 99.59 ± 0.94      |
| BPA 10 μM                | 93.17 ± 1.04 **   | 97.64 ± 1.45     | 97.36 ± 1.43      |
|                          | RZ                | NRU              | CFDA-AM           |
| Control                  | 100.00 ± 1.07     | 100.00 ± 0.70    | 100.00 ± 0.83     |
| BPS 100 pM               | 98.49 ± 1.03      | 97.28 ± 0.88     | 99.50 ± 0.80      |
| BPS 1 nM                 | 96.04 ± 1.11 *    | 94.84 ± 1.21 **  | 98.46 ± 0.58      |
| BPS 10 nM                | 95.03 ± 1.61 *    | 98.90 ± 1.52     | 98.73 ± 1.07      |
| BPS 100 nM               | 97.62 ± 0.95      | 99.84 ± 1.70     | 97.76 ± 0.94      |
| BPS 1 μM                 | 97.87 ± 1.84      | 98.54 ± 1.47     | 99.34 ± 1.26      |
| BPS 10 μM                | 89.82 ± 2.97 *    | 96.58 ± 2.50     | 97.28 ± 0.89      |
|                          | RZ                | NRU              | CFDA-AM           |
| Control                  | 100.00 ± 0.61     | 100.00 ± 0.52    | 100.00 ± 0.54     |
| BPF 100 pM               | 95.10 ± 0.61 *    | 98.55 ± 1.05     | 97.90 ± 0.71      |
| BPF 1 nM                 | 95.16 ± 1.04 *    | 98.99 ± 0.70     | 97.29 ± 0.63 *    |
| BPF 10 nM                | 92.76 ± 1.04 **** | 97.12 ± 0.99     | 96.21 ± 1.04 **   |
| BPF 100 nM               | 93.14 ± 1.23 **** | 97.44 ± 1.04     | 95.95 ± 0.88 **   |
| BPF 1 μM                 | 92.30 ± 1.30 **** | 95.83 ± 1.05     | 95.47 ± 0.85 ***  |
| BPF 10 μM                | 90.83 ± 1.43 **** | 95.24 ± 1.16     | 95.40 ± 0.84 ***  |
|                          | RZ                | NRU              | CFDA-AM           |
| Control                  | 100.00 ± 1.39     | 100.00 ± 0.87    | 100.00 ± 1.16     |
| DEHP 100 pM              | 95.94 ± 1.67      | 99.99 ± 1.20     | 95.93 ± 1.36      |
| DEHP 1 nM                | 93.96 ± 1.49 *    | 99.03 ± 1.11     | 94.08 ± 1.34 *    |
| DEHP 10 nM               | 91.38 ± 1.07 ***  | 99.33 ± 1.37     | 94.65 ± 1.33 *    |
| DEHP 100 nM              | 93.84 ± 1.61 *    | 99.07 ± 0.97     | 94.07 ± 1.52 *    |
| DEHP 1 μM                | 94.53 ± 1.45 *    | 101.80 ± 1.23    | 92.49 ± 1.39 ***  |
| DEHP 10 μM               | 105.00 ± 1.66     | 97.78 ± 1.14     | 92.78 ± 1.30 **   |
|                          | RZ                | NRU              | CFDA-AM           |
| Control                  | 100.00 ± 1.75     | 100.00 ± 1.97    | 100.00 ± 1.10     |
| PFOS 100 pM              | 98.71 ± 1.15      | 95.05 ± 2.08     | 97.57 ± 0.92      |
| PFOS 1 nM                | 98.32 ± 0.81      | 94.99 ± 2.55     | 97.80 ± 0.64      |
| PFOS 10 nM               | 82.48 ± 3.25 **** | 82.20 ± 3.66 *** | 90.85 ± 1.83 **** |
| PFOS 100 nM              | 93.06 ± 2.72      | 92.35 ± 2.94     | 95.84 ± 1.38 *    |
| PFOS 1 μM                | 95.63 ± 1.19      | 88.27 ± 2.60 **  | 96.38 ± 0.83 *    |
| PFOS 10 μM               | 99.78 ± 2.33      | 91.78 ± 2.09 *   | 98.87 ± 1.01      |
|                          | RZ                | NRU              | CFDA-AM           |
| Control                  | 100.00 ± 0.96     | 100.00 ± 2.12    | 100.00 ± 0.68     |
| CdCl <sub>2</sub> 100 pM | 100.90 ± 1.20     | 101.00 ± 2.30    | 99.63 ± 0.76      |
| CdCl <sub>2</sub> 1 nM   | 99.99 ± 0.97      | 100.90 ± 2.61    | 99.07 ± 0.90      |
| CdCl <sub>2</sub> 10 nM  | 97.89 ± 1.26      | 102.90 ± 2.61    | 98.25 ± 0.86      |
| CdCl <sub>2</sub> 100 nM | 100.60 ± 1.00     | 102.10 ± 2.35    | 98.62 ± 1.29      |
| CdCl <sub>2</sub> 1 μM   | 98.95 ± 1.04      | 101.20 ± 1.53    | 97.93 ± 1.16      |
| CdCl <sub>2</sub> 10 μM  | 95.61 ± 1.45 *    | 99.33 ± 1.56     | 97.10 ± 1.27      |
|                          | RZ                | NRU              | CFDA-AM           |
| Control                  | 100.00 ± 0.46     | 100.00 ± 0.58    | 100.00 ± 0.50     |
| DDE 100 pM               | 97.84 ± 0.43 **   | 97.93 ± 0.57     | 98.21 ± 0.59      |
| DDE 1 nM                 | 98.75 ± 0.54      | 99.33 ± 0.62     | 98.91 ± 0.53      |
| DDE 10 nM                | 98.30 ± 0.56      | 99.43 ± 0.69     | 97.87 ± 0.66      |
| DDE 100 nM               | 98.10 ± 0.61 **   | 99.74 ± 0.65     | 97.33 ± 0.59 **   |
| DDE 1 μM                 | 97.26 ± 0.44 ***  | 99.90 ± 0.61     | 97.21 ± 0.57 **   |
| DDE 10 μM                | 97.02 ± 0.49 ***  | 100.10 ± 0.89    | 96.28 ± 0.59 **** |

**Supplemental Table S2.** Viability of pancreatic αTC1-9 cells treated for 72 h with different BPA, BPS, BPF, DEHP, PFOS, CdCl<sub>2</sub>, or DDE concentrations (100 pM–10 μM) as evaluated by RZ, NR and CFDA-AM assays. n= at least 3 independent experiments. All data are expressed as mean ± SEM. \*vs. Control; \*p < 0.05, \*\*p < 0.01, \*\*\*p < 0.001 and \*\*\*\*p < 0.0001 by one-way ANOVA followed by Dunnett's post hoc test, or Kruskal-Wallis followed by Dunn's post hoc test.

| Gene         | Forward                | Reverse                      |
|--------------|------------------------|------------------------------|
|              | (5' → 3')              | (5' → 3')                    |
| <i>Gcg</i>   | CACTCACAGGGCACATTCAC   | TTTGGCAATGTTGTTCCGGTT        |
| <i>Gck</i>   | TTCAGCTTCTGGCCTCCCACAG | AAAACAGCCAGGTCTGGGCAGC       |
| <i>Glut1</i> | GTGTCGCTGTTTGTGTAGAG   | CAAAGCCAAAGATGGCCACGA        |
| <i>Arx</i>   | GGCCGGAGTGCAAGAGTAAAT  | TGCATGGCTTTTTCCTGGTCA        |
| <i>MafB</i>  | ACCAAGGACGAGGTGATCC    | CAGGTGATGTTTCTGCTGGA         |
| <i>Foxo1</i> | AAGAGCGTGCCCTACTTCAA   | CTCTTGCCCAGACTGGAGAG         |
| <i>Hprt</i>  | GGTTAAGCAGTACAGCCCCA   | TCCAACACTTCGAGAGGTCC         |
| <i>Actb</i>  | GGCTGTATTCCCCTCCATCG   | CCAGTTGGTAACAATGCCATGT       |
| <i>Gapdh</i> | ACACTGAGCAAGAGAGGCCCTA | GGGTGCAGCGAACTTTATTGATGGTATT |

**Supplemental Table S3.** Primer sequences used in RT-qPCR for the study of pancreatic  $\alpha$ -cell gene expression.
